# Supplementary material for: VS4-5 内視鏡用マーキングクリップとクリップ探知機を使用した腹腔鏡下大腸切除術における病変部位同定法(Marking Clip Detector System, MCDS)の実際とその有用性についての検討
Source: Hindawi journal article supplement (doi:10.1155/2020/6354183), 1999-06-01
Supplement: f1 [file 6354183.f1.pdf]

**Supplementary Information:**

# 3D Culture System for Liver Tissue Mimicking Hepatic Plates for Improvement of Human Hepatocyte (C3A) Function and Polarity

*Zhidong Jia,<sup>1,2</sup> Yuan Cheng,<sup>1</sup> Xinan Jiang,<sup>1,3</sup> Chengyan Zhang,<sup>4</sup> Gaoshang Wang,<sup>1</sup> Jiecheng Xu,<sup>1</sup>  
Yang Li,<sup>1</sup> Qing Peng,<sup>1</sup> and Yi Gao<sup>1,5</sup>*

<sup>1</sup>Department of Hepatobiliary Surgery II, Guangdong Provincial Research Center for Artificial Organ and Tissue Engineering, Guangzhou Clinical Research and Transformation Center for Artificial Liver, Institute of Regenerative Medicine, Zhujiang Hospital, Southern Medical University, Guangzhou 510280, Guangdong Province, China

<sup>2</sup>Guangzhou Overseas Chinese Hospital, The First Affiliated Hospital of Jinan University, 613 W. Huangpu Avenue, Guangzhou 510630, China

<sup>3</sup>Department of Urology Surgery, The Affiliated Hospital of Guizhou Medical University, Guiyang 550004, Guizhou Province, China

<sup>4</sup>Clifford Hospital, Guangzhou University of Chinese Medicine, Guangzhou 511495, Guangdong Province, China

<sup>5</sup>State Key Laboratory of Organ Failure Research, Co-Innovation Center for Organ Failure Research, Southern Medical University, Guangzhou 510515, Guangdong Province, China

Correspondence should be addressed to Yi Gao

Zhidong Jia and Yuan Cheng contributed equally to this article.

**Table S1.** ELISA kit information

| <b>Name of reagent kit</b>                                         | <b>Catalog number</b> | <b>Brand, country</b> |
|--------------------------------------------------------------------|-----------------------|-----------------------|
| Alpha 1 Antitrypsin Human ELISA Kit                                | ab108798              | Abcam, UK             |
| Apolipoprotein AI Human ELISA Kit                                  | ab108804              | Abcam, UK             |
| Glucokinase Human ELISA Kit                                        | ab125967              | Abcam, UK             |
| Testosterone free Human ELISA Kit                                  | ab178663              | Abcam, UK             |
| Human Coagulation Factor II ELISA Kit                              | abx053005             | Abbexa, UK            |
| Human sTfR Quantikine IVD ELISA Kit                                | DTFR1                 | R&D Systems, USA      |
| Amino Acid Assays                                                  | ab83362               | Abcam, UK             |
| Human ALB / Serum albumin ELISA Kit                                | RAB0603-1KT           | Sigma, Japan          |
| ELISA Kit for Coagulation Factor VII                               | EKU03266              | Biomatic, Canada      |
| ELISA Kit for Cytochrome P450 1A2                                  | EKU03593              | Biomatic, Canada      |
| ELISA Kit for Glutathione S Transferase Alpha 1                    | EKU04486              | Biomatic, Canada      |
| Cytochrome P450 2D6 Activity Assay Kit                             | K703-200              | Biovision, USA        |
| Cytochrome P450 3A4 Human ELISA Kit                                | K7570-100             | Biovision, USA        |
| Nuclear receptor subfamily 1, group I, member 2 (NR1I2), ELISA Kit | MBS9326391            | MyBioSource, USA      |

---

|                                           |          |                                                         |
|-------------------------------------------|----------|---------------------------------------------------------|
| Human Coagulation Factor V (F5) ELISA Kit | EKU03262 | Biomatik, Canada                                        |
| REAGENT™ Diazepam (DIA) ELISA Test Kit    | RNH94016 | REAGEN, USA                                             |
| Blood Ammonia assay kit                   | A086     | Nanjing Jiancheng<br>Bioengineering<br>Institute, China |

---

**Table S2.** Hepatocyte functional genes and primer sequences

| Gene          | Forward primer (5'–3') | Reverse primer (5'–3') |
|---------------|------------------------|------------------------|
| <i>UGT1A1</i> | TGTTGTGCTTATGGCTACCG   | TTCCCACCCACTTCTCAAT    |
| <i>GCK</i>    | TACGAAGACCATCAGTGCG    | CTCCATGTAGCAGGCATTG    |
| <i>ALB</i>    | GTGGGCAGCAAATGTTGTAA   | GAGTTCAGGTGTGAAATAGCG  |
| <i>TF</i>     | GAAGCCTGCACTTTCCGTA    | TCATGCAACACACATAACTGG  |
| <i>A1</i>     | GTACGTGGATGTGCTCAAAGA  | GTGAAACCAGGGCAAACCT    |
| <i>AAT</i>    | GCCAAGAAACAGATCAACGA   | AGTTGTCAAGGAGCTTTAGG   |
| <i>CPS1</i>   | ATGAGTGTGACAAACTGTACTT | CGAAGAGACCCAATAGGTAG   |
| <i>GLUL</i>   | TCCACACAGTTCCTATTGTCA  | CTCCAACCTGATATGATGCAGC |
| <i>CYP3A4</i> | CCGTTGTTCTAAAGGTTGAGT  | ACAATGCAGGTAACCTCAATCT |
| <i>CYP2D6</i> | ATCCCGTGACATCGAAGT     | AGGCACAGATTTCTTGAAGAG  |
| <i>CYP1A2</i> | ACATCTTTGGAGCAGGATTT   | ACAGGTTGGTGATGAGTG     |
| <i>GSTA1</i>  | GCTGACATTCATCTGGTGG    | CAGGCTTGGTCACAAGGTA    |
| <i>F2</i>     | TCAGACAGGGCCATCGAA     | AATGGGTCACCTTCAGCA     |
| <i>F5</i>     | CAAATTACAGGCCAGTCTCG   | CCAAAGGTCCTCGGATTGA    |
| <i>F7</i>     | CCTTCATTGCTGGAGACAGTA  | GGTATGGGCAACAGGTAAC    |

---

*PXR* GTGATTTGGTGTAGGTAGGTC ATCGGTGTGTTTGCAT

*β-actin* CCATCATGAAGTGTGACG AACTGATTGTCAGCGTAGC

---

*UGT1A1*: UDP-glucuronosyltransferase; *GCK*: glucokinase; *ALB*: albumin; *TF*: transferrin;  
*APOA1*: apolipoprotein A1; *AAT*: α1-antitrypsin; *CPS1*: carbamoyl phosphate synthetase; *GLUL*:  
glutamine synthetase; *GSTA1*: glutathione-S-transferase; *F2*: Coagulation Factor II; *F5*:  
Coagulation Factor V; *F7*: Coagulation Factor VII; *PXR/NR1I2*: pregnane X receptor

**Table S3.** Hepatocyte polarity genes and primer sequences

| <b>Gene</b>    | <b>Forward primer (5'–3')</b> | <b>Reverse primer (5'–3')</b> |
|----------------|-------------------------------|-------------------------------|
| <i>ZO1</i>     | TTGACGGGACTGTTGGTATTG         | GTGAAGTTAAGCAGTGACGA          |
| Occludin       | TGCCACTTTGGCATTATGAG          | CACCATTCTGCATTTTCGTTG         |
| <i>MRP2</i>    | GAGAGAACAGCTTTCGTCG           | CTTCAGGCTATTCACATTCCG         |
| <i>DPPIV</i>   | GTGGGCAGTGATGTCACTA           | GTATGCTTGGACTTGGGTTC          |
| <i>NTCP</i>    | CTGAAAGCCAGTGTGGTAA           | CGGCCAAGACTTGATGATT           |
| <i>CD147</i>   | TGCCTGTCTGAAGCCAAT            | TGAGGCTGAGTCGAACAC            |
| <i>β-actin</i> | CCATCATGAAGTGTGACG            | AACTGATTGTCAGCGTAGC           |

*ZO-1*, zona occludens protein 1; *MRP2*, multidrug-resistance associated protein 2; *DPPIV*, dipeptidyl peptidase IV; *NTCP*, (SLC10A1) Na<sup>+</sup>-dependent taurocholate cotransporting polypeptide; *CD147*, cluster of differentiation 147

**Table S4.** Immunofluorescence antibody information

| <b>Name of antibody</b>                                                      | <b>Brand</b>                   | <b>Dilution</b> |
|------------------------------------------------------------------------------|--------------------------------|-----------------|
| Anti-CD147 antibody [EPR4052]                                                | Abcam, UK                      | 1:100           |
| Anti-MRP2 antibody [EPR10998]                                                | Abcam, UK                      | 1:250           |
| Anti-Occludin (C-terminal)<br>produced in rabbit, affinity isolated antibody | Sigma, Japan                   | 1:1000          |
| Anti-ZO-1 tight junction protein antibody                                    | Abcam, UK                      | 1:1000          |
| Donkey Anti-Rabbit IgG H&L (Alexa Fluor® 647)                                | Abcam, UK                      | 1:500           |
| Goat Anti-Rabbit IgG H&L (Alexa Fluor® 488)                                  | Abcam, UK                      | 1:500           |
| DAPI Solution                                                                | Dojindo<br>Laboratories, Japan | 1:1000          |

**Table S5.** Primers used to validate differentially expressed genes associated with bile secretion

| <b>Gene</b> | <b>Forward primer (5'–3')</b> | <b>Reverse primer (5'–3')</b> |
|-------------|-------------------------------|-------------------------------|
| <i>AQP8</i> | GCGTGTTTCTTGAGAGGAAT          | CGGGAAATGAGCTGATGTG           |
| <i>MDR1</i> | TGGTGTCACAGGAAGAGATT          | TGACTCGATGAAGGCATGTA          |
| <i>MDR3</i> | ATCAGTGAAGGAATTGGTGAC         | CCTCTGATGAATCCCCTATG          |
| <i>FXR</i>  | TCAGGAGCCACTTCTTGAT           | AGACAGGCAAAGTGTTGAG           |
| <i>RXRA</i> | CTCAAATGCCTGGAACATCTC         | CTCCATAAGGAAGGTGTCAAT         |
| <i>SHP</i>  | ACCCTCAAGTCCATTCCGA           | CCAGCGATGTCAACATCTC           |
| <i>OSTA</i> | ACCGAAGGAAAGACCACAA           | GTCCAAGCCATCCACCTTA           |
| <i>MRP2</i> | GAGAGAACAGCTTTCGTCG           | CTTCAGATGCCTGCCATTG           |
| <i>NTCP</i> | AAGCCAGTGTGGTAAACTAGA         | ACTGGAAATGCTGGAGAAAG          |
| <i>ACTB</i> | CCATCATGAAGTGTGACG            | GCCGATCCACACGGAGTA            |

*FXR*: farnesoid X receptor; *SHP*: small heterodimer partner; *RXRA*: retinoid X receptor  $\alpha$ ; *MRP2*: multidrug resistance-associated protein; *MDR1*: multidrug resistance 1; *MDR3*: multidrug resistance 3; *NTCP*: Na<sup>+</sup>-dependent taurocholic cotransporting polypeptide; *OSTA*: organic solute transporter-alpha; *AQP8*: aquaporin-8

**Table S6.** Viability trends of the four groups (mean±standard deviation, n=3)

| Time<br>(day) | Viability(OD/10 <sup>4</sup> cells) |                             |                              |                          |
|---------------|-------------------------------------|-----------------------------|------------------------------|--------------------------|
|               | P                                   | S                           | M                            | H                        |
| 1             | 0.004318658±0.0001780362            | 0.0035±0.0002795782▲        | 0.003330909±0.0006248096■    | 0.004550349±0.0007435413 |
| 3             | 0.003850299±0.0001351292***         | 0.003930041±0.0003974338▲▲▲ | 0.003820144±0.00002855132■■■ | 0.005552529±0.0008242053 |
| 5             | 0.004329147±0.0004472979***         | 0.004982825±0.0006998997▲▲  | 0.005367048±0.001574741      | 0.006275122±0.001294016  |
| 7             | 0.004069356±0.0001734511***         | 0.005279788±0.00005051773▲▲ | 0.005716854±0.0005443209     | 0.006551211±0.001029228  |
| 9             | 0.003031145±0.0003739792***         | 0.005363278±0.0001955372    | 0.004611268±0.0003973028■    | 0.005858899±0.000649709  |
| 11            | 0.002896848±0.0004468536***         | 0.004613072±0.0004741096    | 0.003632±0.001180509■■■      | 0.005528369±0.0006200706 |
| 13            | 0.002598022±0.0002967114***         | 0.003247458±0.0002630342▲▲▲ | 0.003666879±0.00127014■■■    | 0.005850794±0.0004796381 |

H, hepatic plate-mimetic group; M, mixed 3D group; S, sandwich group; P, mixed 2D/plate group. H Vs P: \* $P < 0.05$ , \*\* $P < 0.01$ , \*\*\* $P < 0.001$ ; H Vs S: ▲ $P < 0.05$ , ▲▲ $P < 0.01$ , ▲▲▲ $P < 0.001$ ; H Vs M: ■ $P < 0.05$ , ■■ $P < 0.01$ , ■■■ $P < 0.001$ ).

**Table S7.** Dynamic testing of hepatocyte function (mean±standard deviation, n=3)

| Time<br>(day) | CYP1A2(ng/mg)        |                      |                     |                   |
|---------------|----------------------|----------------------|---------------------|-------------------|
|               | P                    | S                    | M                   | H                 |
| 1             | 3.7015±0.3514321***  | 2.0925±0.1378859▲▲▲  | 40.6965±0.8251935   | 39.325±0.07495261 |
| 3             | 3.2375±0.07000355*** | 16.6055±0.2877922▲▲  | 32.3525±1.509672■■■ | 23.6285±0.6611458 |
| 5             | 10.058±0.6420529***  | 1.949±0.1626345▲▲▲   | 35.7295±0.8393359   | 34.1605±1.810901  |
| 7             | 1.326±0.09758075***  | 2.6735±0.1421284▲▲▲  | 29.582±0.4285074■■■ | 59.8605±6.715394  |
| 9             | 6.6535±0.04737609*** | 3.8165±0.2793072▲▲▲  | 28.813±0.2503159■■■ | 74.3775±1.403607  |
| 11            | 15.2955±0.1463709*** | 4.674±0.4440629▲▲▲   | 27.802±0.4525479■■■ | 55.6115±3.380676  |
| 13            | 5.2775±0.8167085***  | 9.863501±0.751655▲▲▲ | 26.572±0■■■         | 39.1735±1.344211  |

H, hepatic plate-mimetic group; M, mixed 3D group; S, sandwich group; P, mixed 2D/plate group. H Vs P: \* $P < 0.05$ , \*\* $P < 0.01$ , \*\*\* $P < 0.001$ ; H Vs S: ▲ $P < 0.05$ , ▲▲ $P < 0.01$ , ▲▲▲ $P < 0.001$ ; H Vs M: ■ $P < 0.05$ , ■■ $P < 0.01$ , ■■■ $P < 0.001$ ).

| Time<br>(day) | CYP2D6 (pU/mg)      |                     |                     |                   |
|---------------|---------------------|---------------------|---------------------|-------------------|
|               | P                   | S                   | M                   | H                 |
| 1             | 6.1935±0.1958685    | 69.3125±2.170111▲▲▲ | 10.0525±2.492551    | 13.4945±3.693219  |
| 3             | 8.7155±3.120462**   | 16.7895±0.6526598   | 18.5785±0.1647557   | 31.578±1.885146   |
| 5             | 9.967±2.231629***   | 13.7675±1.221173▲▲▲ | 81.586±8.67903■■■   | 146.44±5.176027   |
| 7             | 2.6845±0.2029398*** | 19.36±0.8994394▲▲▲  | 51.7155±1.262185■■■ | 124.16±13.56089   |
| 9             | 3.6745±0.1605132*** | 15.9155±3.379264▲▲▲ | 48.06±1.65463■■■    | 93.98351±24.26295 |
| 11            | 3.7815±0.3981012*** | 6.787±0.7537758▲▲▲  | 47.377±4.310524     | 44.7325±3.127533  |
| 13            | 3.238±0.2022325***  | 5.631±0.5218447▲▲▲  | 36.5825±2.396385■■■ | 89.8705±3.59281   |

H, hepatic plate-mimetic group; M, mixed 3D group; S, sandwich group; P, mixed 2D/plate group. H Vs P: \* $P < 0.05$ , \*\* $P < 0.01$ , \*\*\* $P < 0.001$ ; H Vs S: ▲ $P < 0.05$ , ▲▲ $P < 0.01$ , ▲▲▲ $P < 0.001$ ; H Vs M: ■ $P < 0.05$ , ■■ $P < 0.01$ , ■■■ $P < 0.001$ ).

| Time<br>(day) | CYP3A4 (ng/mg)        |                     |                     |                   |
|---------------|-----------------------|---------------------|---------------------|-------------------|
|               | P                     | S                   | M                   | H                 |
| 1             | 0.8285±0.0007070977   | 1.0495±0.06576089   | 1.213±0.02828433    | 1.123±0.08768121  |
| 3             | 0.59±0.04666908       | 0.7065±0.07566042   | 2.942±0.3337543■■■  | 1.2455±0.3528463  |
| 5             | 0.3195±0.009192396*** | 0.4545±0.1081874▲▲▲ | 1.867±0.2489016■    | 2.89±0.7509474    |
| 7             | 0.4485±0.006363963    | 0.8435±0.08838835   | 1.2475±0.1251578    | 0.623±0.05091166  |
| 9             | 0.173±0.02404163      | 0.4475±0.07566042   | 1.3545±0.3966869    | 0.6255±0.01767769 |
| 11            | 0.7555±0.002121335    | 4.8975±0.3132482▲▲▲ | 7.7805±0.7912524■■■ | 1.3175±0.4080006  |
| 13            | 0.7505±0.1180868*     | 0.7065±0.02899138   | 2.1825±0.2326381■   | 1.7685±0.171827   |

H, hepatic plate-mimetic group; M, mixed 3D group; S, sandwich group; P, mixed 2D/plate group. H Vs P: \* $P < 0.05$ , \*\* $P < 0.01$ , \*\*\* $P < 0.001$ ; H Vs S: ▲ $P < 0.05$ , ▲▲ $P < 0.01$ , ▲▲▲ $P < 0.001$ ; H Vs M: ■ $P < 0.05$ , ■■ $P < 0.01$ , ■■■ $P < 0.001$ ).

| Time<br>(day) | GST(pg/mg)           |                      |                      |                   |
|---------------|----------------------|----------------------|----------------------|-------------------|
|               | P                    | S                    | M                    | H                 |
| 1             | 591.605±86.3448*     | 90.35001±18.29709▲▲▲ | 4158.862±530.8326■■■ | 1806.132±264.2621 |
| 3             | 649.244±77.46919     | 144.728±4.710747     | 1547.7±205.2767      | 900.0795±87.89552 |
| 5             | 659.7305±66.39238*** | 345.688±28.83158▲▲▲  | 1403.817±84.50064■■■ | 5637.073±607.0764 |
| 7             | 216.0165±6.111517*** | 374.615±59.54546▲▲▲  | 833.783±21.56533■■■  | 7208±166.8772     |
| 9             | 266.615±11.67151***  | 874.714±43.76▲▲▲     | 3004.685±214.0433■■■ | 11074.01±1251.596 |
| 11            | 524.7104±9.00219***  | 581.3365±30.03296▲▲▲ | 5631.476±602.7795■■■ | 8017±687.3078     |
| 13            | 180.9035±6.549931*** | 540.233±6.59024▲▲▲   | 3268.76±126.2279     | 3916.537±73.46556 |

H, hepatic plate-mimetic group; M, mixed 3D group; S, sandwich group; P, mixed 2D/plate group. H Vs P: \* $P < 0.05$ , \*\* $P < 0.01$ , \*\*\* $P < 0.001$ ; H Vs S: ▲ $P < 0.05$ , ▲▲ $P < 0.01$ , ▲▲▲ $P < 0.001$ ; H Vs M: ■ $P < 0.05$ , ■■ $P < 0.01$ , ■■■ $P < 0.001$ ).

| Time<br>(day) | $\Delta$ DIA (ppb/10 <sup>4</sup> cells) |                               |                            |                            |
|---------------|------------------------------------------|-------------------------------|----------------------------|----------------------------|
|               | P                                        | S                             | M                          | H                          |
| 1             | 0.0007421385±0.0004447213                | 0.00157783±0.0001701059▲▲▲    | 0.0004145455±0.00003085602 | 0.000442672±0.0002030372   |
| 3             | 0.0006691615±0.00006986425               | 0.001549382±0.0001833238▲     | 0.000582734±0.0000763067   | 0.00103891±0.00004952502   |
| 5             | 0.0005353605±0.0001261853**              | 0.0009589905±0.00002379342    | 0.0006019575±0.0001038167■ | 0.00115317±0.0003559682    |
| 7             | 0.000368517±0.00008793298**              | 0.000484554±0.0002958238▲     | 0.000710112±0.0001144085   | 0.001016759±0.0002054166   |
| 9             | 0.0003093435±0.00003749858***            | 0.00022695±0.0001002989▲▲▲    | 0.000701408±0.000119511■■■ | 0.001436505±0.0003784966   |
| 11            | 0.000381089±0.0001215658***              | 0.00012549±0.00001663823▲▲▲   | 0.000648±0.00001131371■■   | 0.00137234±0.0001654934    |
| 13            | 0.0002146595±0.00004195759**             | 0.0001101695±0.00001198475▲▲▲ | 0.0006484425±0.00009709778 | 0.0009380955±0.00002020275 |

H, hepatic plate-mimetic group; M, mixed 3D group; S, sandwich group; P, mixed 2D/plate group. H Vs P: \* $P < 0.05$ , \*\* $P < 0.01$ , \*\*\* $P < 0.001$ ; H Vs S: ▲ $P < 0.05$ , ▲▲ $P < 0.01$ , ▲▲▲ $P < 0.001$ ; H Vs M: ■ $P < 0.05$ , ■■ $P < 0.01$ , ■■■ $P < 0.001$ ).

| Time<br>(day) | $\Delta\text{NH}_3(\text{mmol/L}/10^4\text{cells})$ |                              |                            |                          |
|---------------|-----------------------------------------------------|------------------------------|----------------------------|--------------------------|
|               | P                                                   | S                            | M                          | H                        |
| 1             | 0.0133522±0.001325269***                            | 0.00825±0.001841147          | 0.003578182±0.0002622723   | 0.005842936±0.0007869669 |
| 3             | 0.006649492±0.0004923457                            | 0.007751939±0.001421116      | 0.012088±0.0001183056      | 0.009818116±0.0001279717 |
| 5             | 0.000974884±0.0001972672***                         | 0.005696166±0.001913607▲▲▲   | 0.01269984±0.000339134■    | 0.01592195±0.0006622653  |
| 7             | 0.002527551±0.0002327576***                         | 0.003222561±0.0001161119▲▲▲  | 0.01537978±0.0002669522    | 0.01770279±0.001144012   |
| 9             | 0.002239449±0.00003875798***                        | 0.00375685±0.0005131565▲▲▲   | 0.01235239±0.0004625083■■■ | 0.01809012±0.001019625   |
| 11            | 0.002021279±0.0006596585***                         | 0.005213559±0.0002794458▲▲▲  | 0.01314729±0.001490956■■■  | 0.02287234±0.002256724   |
| 13            | 0.001259522±0.0003883876***                         | 0.001697542±0.00002229716▲▲▲ | 0.009028608±0.0006958689   | 0.01095238±0.002020305   |

H, hepatic plate-mimetic group; M, mixed 3D group; S, sandwich group; P, mixed 2D/plate group. H Vs P: \* $P < 0.05$ , \*\* $P < 0.01$ , \*\*\* $P < 0.001$ ; H Vs S: ▲ $P < 0.05$ , ▲▲ $P < 0.01$ , ▲▲▲ $P < 0.001$ ; H Vs M: ■ $P < 0.05$ , ■■ $P < 0.01$ , ■■■ $P < 0.001$ ).

| Time<br>(day) | Urea(nmol/10 <sup>4</sup> cells) |                            |                        |                        |
|---------------|----------------------------------|----------------------------|------------------------|------------------------|
|               | P                                | S                          | M                      | H                      |
| 1             | 0.1425472±0.008173971            | 0.1755283±0.006123811▲▲    | 0.1369855±0.002360455  | 0.1300857±0.01554929   |
| 3             | 0.1004102±0*                     | 0.1720494±0▲               | 0.1008075±0.02337268■  | 0.135858±0.01263713    |
| 5             | 0.06908129±0***                  | 0.1030578±0.01639358       | 0.1184144±0.012721     | 0.13536±0.02662309     |
| 7             | 0.03460418±0.007553625***        | 0.04362577±0.0009136857▲▲▲ | 0.08534382±0.005841179 | 0.1040056±0.004321648  |
| 9             | 0.01972222±0.001092801***        | 0.05575177±0.008194414▲▲▲  | 0.1035296±0.005485555  | 0.1143086±0.004402923  |
| 11            | 0.0184298±0.004343946***         | 0.03663334±0.001699827▲▲▲  | 0.07718±0.003467653■■■ | 0.1319628±0.02304115   |
| 13            | 0.01583944±0.002853108***        | 0.04360508±0.0007358708▲▲▲ | 0.1016376±0.02313089   | 0.1170952±0.0005252762 |

H, hepatic plate-mimetic group; M, mixed 3D group; S, sandwich group; P, mixed 2D/plate group. H Vs P: \* $P < 0.05$ , \*\* $P < 0.01$ , \*\*\* $P < 0.001$ ; H Vs S: ▲ $P < 0.05$ , ▲▲ $P < 0.01$ , ▲▲▲ $P < 0.001$ ; H Vs M: ■ $P < 0.05$ , ■■ $P < 0.01$ , ■■■ $P < 0.001$ ).

| Time<br>(day) | $\Delta$ TT (pg/ml/10 <sup>4</sup> cells) |                              |                              |                          |
|---------------|-------------------------------------------|------------------------------|------------------------------|--------------------------|
|               | P                                         | S                            | M                            | H                        |
| 1             | 0.009759748±0.0002490437***               | 0.009642452±0.0003502186▲▲▲  | 0.005574545±0.0009102395■■■  | 0.008008774±0.0003130161 |
| 3             | 0.006157185±0.0001841863***               | 0.009560494±0.000218243▲▲▲   | 0.007202158±0.00009919886■■■ | 0.008385993±0.0002393704 |
| 5             | 0.003169531±0.0001507219***               | 0.005605889±0.0002795709▲▲▲  | 0.006341599±0.0002214758■■   | 0.007100488±0.0002897411 |
| 7             | 0.002501972±0.0000514725***               | 0.003899735±0.0001310615▲▲▲  | 0.005855281±0.00022246■■■    | 0.004793296±0.0002686213 |
| 9             | 0.00192399±0.00004642574***               | 0.003479433±0.0001136724▲▲▲  | 0.005411831±0.000473264■■■   | 0.006609012±0.0003862209 |
| 11            | 0.001855015±0.00007496533***              | 0.002862353±0.00009428135▲▲▲ | 0.0055312±0.0001187939■■■    | 0.007722341±0.0001955825 |
| 13            | 0.002402792±0.0000962555***               | 0.002398136±0.00003140056▲▲▲ | 0.005205849±0.0001780128■■■  | 0.007651429±0.0001683585 |

H, hepatic plate-mimetic group; M, mixed 3D group; S, sandwich group; P, mixed 2D/plate group. H Vs P: \* $P < 0.05$ , \*\* $P < 0.01$ , \*\*\* $P < 0.001$ ; H Vs S: ▲ $P < 0.05$ , ▲▲ $P < 0.01$ , ▲▲▲ $P < 0.001$ ; H Vs M: ■ $P < 0.05$ , ■■ $P < 0.01$ , ■■■ $P < 0.001$ ).

| Time<br>(day) | PXR (pg/ml/10 <sup>4</sup> cells)     |                                       |                                   |                        |
|---------------|---------------------------------------|---------------------------------------|-----------------------------------|------------------------|
|               | P                                     | S                                     | M                                 | H                      |
| 1             | 0.2128491±0.03967802 <sup>***</sup>   | 0.1054316±0.01113693                  | 0.07521273±0.03433454             | 0.09579661±0.01883174  |
| 3             | 0.07191917±0 <sup>***</sup>           | 0.09198149±0.009716171 <sup>▲▲▲</sup> | 0.1224604±0.03400217 <sup>■</sup> | 0.2170564±0.02762669   |
| 5             | 0.03141524±0.003901239 <sup>***</sup> | 0.0533123±0.006620483 <sup>▲▲▲</sup>  | 0.269168±0.03460554 <sup>■</sup>  | 0.2046263±0.009230329  |
| 7             | 0.02597361±0.002387049 <sup>***</sup> | 0.04240247±0.008335498 <sup>▲▲▲</sup> | 0.2223371±0                       | 0.1871508±0.01185096   |
| 9             | 0.01600505±0.00596041 <sup>***</sup>  | 0.09583215±0.01492781                 | 0.08178169±0.01996431             | 0.1300501±0.02581502   |
| 11            | 0.02453868±0.006767153 <sup>**</sup>  | 0.03576667±0.006175401 <sup>▲▲</sup>  | 0.059604±0.006296081              | 0.1029468±0.008379968  |
| 13            | 0.01780105±0.0004936173               | 0.01959661±0                          | 0.03137699±0.005998495            | 0.06190477±0.006734353 |

H, hepatic plate-mimetic group; M, mixed 3D group; S, sandwich group; P, mixed 2D/plate group. H Vs P: \* $P < 0.05$ , \*\* $P < 0.01$ , \*\*\* $P < 0.001$ ; H Vs S: ▲ $P < 0.05$ , ▲▲ $P < 0.01$ , ▲▲▲ $P < 0.001$ ; H Vs M: ■ $P < 0.05$ , ■■ $P < 0.01$ , ■■■ $P < 0.001$ ).

| Time<br>(day) | ALB (pg/ml/10 <sup>4</sup> cells) |                       |                       |                     |
|---------------|-----------------------------------|-----------------------|-----------------------|---------------------|
|               | P                                 | S                     | M                     | H                   |
| 1             | 7.830189±0.2045717***             | 3.870283±0.2829161    | 6.381818±0.2314169■   | 4.415779±0.373327   |
| 3             | 14.43413±0.3429681***             | 8.350877±0.5149661▲   | 10.95814±1.358897■■■  | 6.63656±0.8095354   |
| 5             | 14.82155±0.07010268***            | 7.53931±0.4573725▲▲▲  | 10.19464±0.4828653    | 11.41556±1.261252   |
| 7             | 8.423335±0.4453998***             | 9.696382±0.2920797▲▲▲ | 10.4±0.2669528■■      | 12.95562±0.5138732  |
| 9             | 6.807367±0.1772356***             | 8.085107±0.1337319▲▲▲ | 10.99126±0.3777922■■  | 13.06845±0.02193727 |
| 11            | 6.84962±0.1131592***              | 7.294118±0.1663779▲▲▲ | 12.28059±0.05012576   | 13.62264±0.4313578  |
| 13            | 6.461136±0.1287229***             | 7.21017±0.2061396▲▲▲  | 12.36738±0.01609672■■ | 14.6085±0.954533    |

H, hepatic plate-mimetic group; M, mixed 3D group; S, sandwich group; P, mixed 2D/plate group. H Vs P: \* $P < 0.05$ , \*\* $P < 0.01$ , \*\*\* $P < 0.001$ ; H Vs S: ▲ $P < 0.05$ , ▲▲ $P < 0.01$ , ▲▲▲ $P < 0.001$ ; H Vs M: ■ $P < 0.05$ , ■■ $P < 0.01$ , ■■■ $P < 0.001$ ).

| Time<br>(day) | AAT ( $\mu\text{g/ml}/10^4\text{cells}$ ) |                                   |                                  |                                |
|---------------|-------------------------------------------|-----------------------------------|----------------------------------|--------------------------------|
|               | P                                         | S                                 | M                                | H                              |
| 1             | 0.009471698 $\pm$ 0.001956773             | 0.01412264 $\pm$ 0.002701682▲▲▲   | 0.006987273 $\pm$ 0.0004088366   | 0.007932204 $\pm$ 0.0004906753 |
| 3             | 0.00847006 $\pm$ 0.0003810753             | 0.01458642 $\pm$ 0.002173699▲▲▲   | 0.01040288 $\pm$ 0.001144597     | 0.01042996 $\pm$ 0.000586046   |
| 5             | 0.006986946 $\pm$ 0.0002278347***         | 0.01285804 $\pm$ 0.00008922488    | 0.01341436 $\pm$ 0.000159186     | 0.01335805 $\pm$ 0.0008112754  |
| 7             | 0.006085835 $\pm$ 0.0002981125***         | 0.008316858 $\pm$ 0.0004456087▲▲▲ | 0.01337977 $\pm$ 0.001061455■■■  | 0.01851955 $\pm$ 0.0004345353  |
| 9             | 0.004233586 $\pm$ 0.00003035594***        | 0.008879432 $\pm$ 0.000869257▲▲▲  | 0.01238451 $\pm$ 0.0007827973■■■ | 0.01649522 $\pm$ 0.0001544879  |
| 11            | 0.003965616 $\pm$ 0.00008509614***        | 0.005033334 $\pm$ 0.000646101▲▲▲  | 0.010868 $\pm$ 0.0001527349■■■   | 0.01519681 $\pm$ 0.0003535534  |
| 13            | 0.005345549 $\pm$ 0.0001752344***         | 0.00359661 $\pm$ 0.0003451642▲▲▲  | 0.009291799 $\pm$ 0.000172619■■  | 0.01228571 $\pm$ 0.0001346868  |

H, hepatic plate-mimetic group; M, mixed 3D group; S, sandwich group; P, mixed 2D/plate group. H Vs P: \* $P < 0.05$ , \*\* $P < 0.01$ , \*\*\* $P < 0.001$ ; H Vs S: ▲ $P < 0.05$ , ▲▲ $P < 0.01$ , ▲▲▲ $P < 0.001$ ; H Vs M: ■ $P < 0.05$ , ■■ $P < 0.01$ , ■■■ $P < 0.001$ ).

| Time<br>(day) | APOA1(ug/ml/10 <sup>4</sup> cells)     |                              |                         |                         |
|---------------|----------------------------------------|------------------------------|-------------------------|-------------------------|
|               | P                                      | S                            | M                       | H                       |
| 1             | 0.04±0.006759762 <sup>***</sup>        | 0.02969575±0.001390866▲▲▲    | 0.01735091±0.001056803  | 0.01756929±0.0002791768 |
| 3             | 0.04935629±0.005017495 <sup>***</sup>  | 0.02604321±0.002034023▲▲▲    | 0.01565827±0.002685988  | 0.01421206±0.0009492287 |
| 5             | 0.03104098±0.0008061849 <sup>***</sup> | 0.02154364±0.0004758656      | 0.01634095±0.0005052406 | 0.01641366±0.001374201  |
| 7             | 0.01488778±0.0002037464 <sup>*</sup>   | 0.01158958±0.000542968▲▲     | 0.01342921±0.001576291■ | 0.02148045±0.003705398  |
| 9             | 0.01015657±0.000778532 <sup>**</sup>   | 0.007413711±0.00002005992▲▲▲ | 0.01837183±0.001613398  | 0.01827583±0.001112317  |
| 11            | 0.009723496±0.001237943 <sup>***</sup> | 0.005988235±0.00068215▲▲▲    | 0.014532±0.002720947■   | 0.02246809±0.0005566584 |
| 13            | 0.007921467±0.0002542133 <sup>**</sup> | 0.006376271±0.001107402▲▲    | 0.01368214±0.002195493  | 0.01628571±0.001912556  |

H, hepatic plate-mimetic group; M, mixed 3D group; S, sandwich group; P, mixed 2D/plate group. H Vs P: \* $P < 0.05$ , \*\* $P < 0.01$ , \*\*\* $P < 0.001$ ; H Vs S: ▲ $P < 0.05$ , ▲▲ $P < 0.01$ , ▲▲▲ $P < 0.001$ ; H Vs M: ■ $P < 0.05$ , ■■ $P < 0.01$ , ■■■ $P < 0.001$ ).

| Time<br>(day) | TF (nM/10 <sup>4</sup> cells)        |                                        |                                     |                       |
|---------------|--------------------------------------|----------------------------------------|-------------------------------------|-----------------------|
|               | P                                    | S                                      | M                                   | H                     |
| 1             | 0.6903774±0.03475943 <sup>***</sup>  | 0.2334056±0.009205725                  | 0.4169291±0.01773424 <sup>■■■</sup> | 0.2502832±0.01846796  |
| 3             | 1.189347±0.01825355 <sup>***</sup>   | 0.4179074±0.02408528 <sup>▲</sup>      | 0.5091798±0.05437599 <sup>■■■</sup> | 0.3421459±0.03510495  |
| 5             | 0.9372794±0.01893835                 | 0.3553438±0.01504331 <sup>▲▲▲</sup>    | 0.4629592±0.009551129               | 0.5079922±0.03615972  |
| 7             | 0.3392144±0.0130655 <sup>***</sup>   | 0.1494334±0 <sup>▲▲▲</sup>             | 0.5605079±0.01899816                | 0.5798491±0.01816356  |
| 9             | 0.2761818±0.005746133 <sup>***</sup> | 0.09402128±0.0003844794 <sup>▲▲▲</sup> | 0.5007253±0.01098901 <sup>■■</sup>  | 0.5957943±0.003553232 |
| 11            | 0.2822521±0.003959001 <sup>***</sup> | 0.04034118±0.0006377819 <sup>▲▲▲</sup> | 0.541608±0.004548109 <sup>■</sup>   | 0.6120053±0.01210356  |
| 13            | 0.246534±0.002838295 <sup>***</sup>  | 0.03078135±0.001378259 <sup>▲▲▲</sup>  | 0.5436542±0.01054055 <sup>■■■</sup> | 0.6431286±0.03715337  |

H, hepatic plate-mimetic group; M, mixed 3D group; S, sandwich group; P, mixed 2D/plate group. H Vs P: \* $P < 0.05$ , \*\* $P < 0.01$ , \*\*\* $P < 0.001$ ; H Vs S: ▲ $P < 0.05$ , ▲▲ $P < 0.01$ , ▲▲▲ $P < 0.001$ ; H Vs M: ■ $P < 0.05$ , ■■ $P < 0.01$ , ■■■ $P < 0.001$ ).

| Time<br>(day) | GCK(ng/ml/10 <sup>4</sup> cells) |                           |                        |                         |
|---------------|----------------------------------|---------------------------|------------------------|-------------------------|
|               | P                                | S                         | M                      | H                       |
| 1             | 0.008446541±0.001378636          | 0.01023113±0.0005203239   | 0.01128±0.002005612    | 0.009732801±0.001091327 |
| 3             | 0.01400748±0.006675173           | 0.01260494±0.003858533    | 0.02321763±0.001823726 | 0.01374514±0.004085811  |
| 5             | 0.01667796±0.0006694855          | 0.01877182±0.0001606045   | 0.03097879±0.00903897  | 0.02099707±0.002624229  |
| 7             | 0.01155293±0.002899631**         | 0.01005649±0.0003969285▲▲ | 0.0363236±0.005644143  | 0.02657542±0.002109469  |
| 9             | 0.01307197±0.0005589001***       | 0.01812293±0.002306873▲▲▲ | 0.03837465±0.001673156 | 0.04780883±0.009060751  |
| 11            | 0.01652292±0.002336086***        | 0.02021177±0.004176089▲▲▲ | 0.050512±0.0003280974■ | 0.06393085±0.002835951  |
| 13            | 0.02332286±0.001525277***        | 0.02196271±0.00288116▲▲▲  | 0.05791354±0.005194741 | 0.06287619±0.003878988  |

H, hepatic plate-mimetic group; M, mixed 3D group; S, sandwich group; P, mixed 2D/plate group. H Vs P: \* $P < 0.05$ , \*\* $P < 0.01$ , \*\*\* $P < 0.001$ ; H Vs S: ▲ $P < 0.05$ , ▲▲ $P < 0.01$ , ▲▲▲ $P < 0.001$ ; H Vs M: ■ $P < 0.05$ , ■■ $P < 0.01$ , ■■■ $P < 0.001$ ).

| Time<br>(day) | F2 (ng/ml/10 <sup>4</sup> cells) |                            |                            |                         |
|---------------|----------------------------------|----------------------------|----------------------------|-------------------------|
|               | P                                | S                          | M                          | H                       |
| 1             | 0.02425786±0.00146758            | 0.0280684±0.0005503417▲    | 0.01594364±0.001689342     | 0.0210987±0.0004652946  |
| 3             | 0.02028593±0.0003493197          | 0.02584568±0.0004801343    | 0.01725±0.0004196865       | 0.02186965±0.001361937  |
| 5             | 0.01228354±0.0005748461***       | 0.02431125±0.0006543153    | 0.01672268±0.0003806611■   | 0.02354342±0            |
| 7             | 0.008765545±0.000235917***       | 0.02184996±0.003085556     | 0.01782921±0.001747905     | 0.0230838±0.0008690694  |
| 9             | 0.007506314±0.00009820907***     | 0.03275887±0.0001838814    | 0.01908591±0.0009859663■■■ | 0.03787346±0.009763673  |
| 11            | 0.008911175±0.0002228699***      | 0.01402745±0.0004547671▲▲▲ | 0.02224±0.002489016■■■     | 0.02957447±0.0008274651 |
| 13            | 0.01305934±0.000407234***        | 0.01100847±0.0001318334▲▲▲ | 0.02602924±0.001478047     | 0.02490476±0.0007407783 |

H, hepatic plate-mimetic group; M, mixed 3D group; S, sandwich group; P, mixed 2D/plate group. H Vs P: \* $P < 0.05$ , \*\* $P < 0.01$ , \*\*\* $P < 0.001$ ; H Vs S: ▲ $P < 0.05$ , ▲▲ $P < 0.01$ , ▲▲▲ $P < 0.001$ ; H Vs M: ■ $P < 0.05$ , ■■ $P < 0.01$ , ■■■ $P < 0.001$ ).

| Time<br>(day) | F5(pg/ml/10 <sup>4</sup> cells)    |                                    |                                    |                      |
|---------------|------------------------------------|------------------------------------|------------------------------------|----------------------|
|               | P                                  | S                                  | M                                  | H                    |
| 1             | 0.3143899±0.2222717                | 0.3536887±0.2500556                | 0.4770873±0.2890858                | 0.07476969±0.1057403 |
| 3             | 1.513801±0.07919385                | 2.157648±0.2176753                 | 2.894277±0.475008 <sup>■</sup>     | 2.040111±0.2058176   |
| 5             | 2.438506±0.2174668 <sup>***</sup>  | 1.679912±0.1482619 <sup>▲▲▲</sup>  | 4.815±0.2576383 <sup>■■■</sup>     | 3.722827±0.1029905   |
| 7             | 1.849239±0.2125267 <sup>***</sup>  | 1.848622±0.1862531 <sup>▲▲▲</sup>  | 6.425789±1.021895 <sup>■■■</sup>   | 4.733553±0.1962678   |
| 9             | 1.852159±0.1324647 <sup>***</sup>  | 2.003088±0.08305407 <sup>▲▲▲</sup> | 7.659164±0.294768 <sup>■■■</sup>   | 5.644938±0.09581395  |
| 11            | 1.213878±0.1509988 <sup>***</sup>  | 1.977812±0.03440135                | 5.125372±0.07003728 <sup>■■■</sup> | 2.588356±0.0936916   |
| 13            | 0.9578255±0.2457968 <sup>***</sup> | 1.667575±0.02974396 <sup>▲▲</sup>  | 4.084013±0.2675696 <sup>■■■</sup>  | 2.791481±0.083809    |

H, hepatic plate-mimetic group; M, mixed 3D group; S, sandwich group; P, mixed 2D/plate group. H Vs P: \* $P < 0.05$ , \*\* $P < 0.01$ , \*\*\* $P < 0.001$ ; H Vs S: ▲ $P < 0.05$ , ▲▲ $P < 0.01$ , ▲▲▲ $P < 0.001$ ; H Vs M: ■ $P < 0.05$ , ■■ $P < 0.01$ , ■■■ $P < 0.001$ ).

| Time<br>(day) | F7(pg/ml/10 <sup>4</sup> cells)      |                                     |                                   |                       |
|---------------|--------------------------------------|-------------------------------------|-----------------------------------|-----------------------|
|               | P                                    | S                                   | M                                 | H                     |
| 1             | 0.5670252±0.08715644 <sup>***</sup>  | 1.333054±0.1177633 <sup>▲▲▲</sup>   | 0.9658527±0.0235968               | 1.27008±0.1027117     |
| 3             | 0.6475195±0.02795187                 | 1.211389±0.1025655 <sup>▲▲▲</sup>   | 0.4936996±0.04417382 <sup>■</sup> | 0.7849553±0.02184876  |
| 5             | 0.5455965±0.006070917                | 0.6968959±0.05992936                | 0.5217798±0.01535797              | 0.6577229±0.1174115   |
| 7             | 0.2771429±0.009359467 <sup>***</sup> | 0.4248111±0.01477997 <sup>▲</sup>   | 0.6024629±0.01962741              | 0.6005642±0.04557878  |
| 9             | 0.2197121±0.00624611 <sup>***</sup>  | 0.243565±0.06088139 <sup>▲▲▲</sup>  | 0.4692338±0.02384245 <sup>■</sup> | 0.6862667±0.09558206  |
| 11            | 0.1962751±0.006078281 <sup>***</sup> | 0.2411529±0.03678619 <sup>▲▲▲</sup> | 0.643424±0.07937697               | 0.7411649±0.009937089 |
| 13            | 0.1535777±0.009872341 <sup>***</sup> | 0.2107254±0.01801084 <sup>▲▲▲</sup> | 0.905569±0.02792106               | 0.9380952±0.04714045  |

H, hepatic plate-mimetic group; M, mixed 3D group; S, sandwich group; P, mixed 2D/plate group. H Vs P: \* $P < 0.05$ , \*\* $P < 0.01$ , \*\*\* $P < 0.001$ ; H Vs S: ▲ $P < 0.05$ , ▲▲ $P < 0.01$ , ▲▲▲ $P < 0.001$ ; H Vs M: ■ $P < 0.05$ , ■■ $P < 0.01$ , ■■■ $P < 0.001$ ).

**Table S8.** Quantification of hepatocyte functional gene expression levels (mean±standard deviation, n=3)

| Time (day) |        | <i>CYP3A4</i> Relative expression |                      |                     |  |
|------------|--------|-----------------------------------|----------------------|---------------------|--|
|            | P      | S                                 | M                    | H                   |  |
| 1          | 1±0    | 0.7056401±0.1090831               | 0.384651±0.05200034  | 0.3896478±0.2103232 |  |
| 7          | 1±0**  | 2.240479±0.7401251*               | 3.165113±1.366681    | 5.159448±2.042862   |  |
| 13         | 1±0*** | 2.165119±0.120206***              | 14.06088±1.032818*** | 8.110536±0.5164277  |  |

  

| Time (day) |        | <i>CYP2D6</i> Relative expression |                      |                     |  |
|------------|--------|-----------------------------------|----------------------|---------------------|--|
|            | P      | S                                 | M                    | H                   |  |
| 1          | 1±0    | 0.506513±0.2540927                | 2.099574±0.03430062  | 1.730353±0.3813379  |  |
| 7          | 1±0*** | 0.8426434±0.1870459***            | 4.000867±1.370987*** | 8.349505±0.06820507 |  |
| 13         | 1±0**  | 0.609924±0.005978741***           | 1.587294±0.1501846*  | 3.160521±0.5700326  |  |

  

| Time (day) |        | <i>CYP1A2</i> Relative expression |                       |                      |  |
|------------|--------|-----------------------------------|-----------------------|----------------------|--|
|            | P      | S                                 | M                     | H                    |  |
| 1          | 1±0**  | 0.5979288±0.06823251***           | 1.230192±0.096374     | 1.531559±0.002502006 |  |
| 7          | 1±0*** | 1.127623±0.07547683***            | 2.392805±0.1796575*** | 4.033256±0.1120052   |  |
| 13         | 1±0*** | 0.4945228±0.07085421***           | 1.576838±0.04644987*  | 2.063296±0.3688198   |  |

  

| Time (day) |        | <i>GSTA1</i> Relative expression |                   |                      |  |
|------------|--------|----------------------------------|-------------------|----------------------|--|
|            | P      | S                                | M                 | H                    |  |
| 1          | 1±0    | 0.9825979±0.2462008              | 1.43493±0.4673636 | 0.8245517±0.07935742 |  |
| 7          | 1±0    | 3.931367±0.2695513               | 1.704588±1.81742  | 1.259788±0.145805    |  |
| 13         | 1±0*** | 10.8378±5.59094***               | 47.38522±15.50688 | 52.10273±4.293867    |  |

| Time  |     | <i>UGT1A1</i> Relative expression |                      |                     |  |
|-------|-----|-----------------------------------|----------------------|---------------------|--|
| (day) | P   | S                                 | M                    | H                   |  |
| 1     | 1±0 | 1.042135±0.2196891                | 0.818848±0.001337783 | 1.027272±0.1055478  |  |
| 7     | 1±0 | 3.374777±0.313821 <sup>***</sup>  | 0.8115302±0.5147988  | 0.942058±0.03692894 |  |
| 13    | 1±0 | 0.4141446±0.02704529              | 0.765632±0.04750228  | 0.5472754±0.2009406 |  |

| Time  |                    | <i>PXR</i> Relative expression     |                       |                    |  |
|-------|--------------------|------------------------------------|-----------------------|--------------------|--|
| (day) | P                  | S                                  | M                     | H                  |  |
| 1     | 1±0                | 0.5288886±0.04573904               | 0.6965783±0.005690162 | 0.902119±0.0559703 |  |
| 7     | 1±0 <sup>***</sup> | 0.547569±0.03040069 <sup>***</sup> | 2.268824±0.06300616   | 2.039688±0.1963058 |  |
| 13    | 1±0 <sup>***</sup> | 1.192986±0.1070541 <sup>***</sup>  | 4.96552±0.1378944     | 4.545526±0.5039532 |  |

| Time  |                    | <i>CPSI</i> Relative expression      |                                  |                      |  |
|-------|--------------------|--------------------------------------|----------------------------------|----------------------|--|
| (day) | P                  | S                                    | M                                | H                    |  |
| 1     | 1±0                | 0.3033684±0.01436794 <sup>**</sup>   | 0.8501619±0.04026486             | 0.8600403±0.04073274 |  |
| 7     | 1±0 <sup>**</sup>  | 0.1493876±0.005368223 <sup>***</sup> | 1.075775±0.1957557 <sup>**</sup> | 1.55248±0.06068455   |  |
| 13    | 1±0 <sup>***</sup> | 0.4146159±0.04798674 <sup>***</sup>  | 1.587399±0.09733891 <sup>*</sup> | 1.968869±0.2470322   |  |

| Time  |                    | <i>GLUL</i> Relative expression    |                      |                      |  |
|-------|--------------------|------------------------------------|----------------------|----------------------|--|
| (day) | P                  | S                                  | M                    | H                    |  |
| 1     | 1±0 <sup>***</sup> | 0.9625646±0.1301275 <sup>***</sup> | 2.158501±0.4135661   | 2.654592±0.4060807   |  |
| 7     | 1±0                | 0.6850677±0.1640518                | 0.4513991±0.08358987 | 0.6314178±0          |  |
| 13    | 1±0                | 0.7130198±0.02212967               | 0.6863669±0.0224233  | 0.7292306±0.08084828 |  |

| Time  |        | <i>ALB</i> Relative expression   |                         |                      |  |
|-------|--------|----------------------------------|-------------------------|----------------------|--|
| (day) | P      | S                                | M                       | H                    |  |
| 1     | 1±0*   | 0.3121235±0.007138475            | 0.4784094±0.02890191    | 0.5428215±0.01330133 |  |
| 7     | 1±0    | 1.629671±0.09579464**            | 0.7721775±0.1193689     | 0.9822235±0.1692553  |  |
| 13    | 1±0    | 0.4493926±0.02421691*            | 0.7994345±0.02611714    | 0.9660175±0.4956045  |  |
| Time  |        | <i>AAT</i> Relative expression   |                         |                      |  |
| (day) | P      | S                                | M                       | H                    |  |
| 1     | 1±0*** | 0.5183659±0.09432557***          | 1.718029±0.07856451     | 1.656394±0.1890189   |  |
| 7     | 1±0*** | 0.4611424±0.03086622             | 0.2698752±0.0272899     | 0.4435935±0.03547374 |  |
| 13    | 1±0**  | 0.5554886±0.01179707             | 0.4514386±0.03830622    | 0.5974686±0.2120699  |  |
| Time  |        | <i>TF</i> Relative expression    |                         |                      |  |
| (day) | P      | S                                | M                       | H                    |  |
| 1     | 1±0*** | 0.4744391±0.09925693***          | 1.521426±0.05218834***  | 2.254255±0.2462642   |  |
| 7     | 1±0    | 0.426224±0.03894124**            | 0.5543753±0.02263669*   | 0.8673656±0.09897926 |  |
| 13    | 1±0    | 0.6115146±0.0469102**            | 0.7873337±0.009004042*  | 1.06672±0.1234597    |  |
| Time  |        | <i>APOA1</i> Relative expression |                         |                      |  |
| (day) | P      | S                                | M                       | H                    |  |
| 1     | 1±0    | 0.7381235±0.1872802              | 0.7838294±0.02176725    | 0.8890349±0.02614074 |  |
| 7     | 1±0*** | 0.5106506±0.06241506*            | 0.2189659±0.1547011     | 0.2737854±0.04011261 |  |
| 13    | 1±0*   | 0.4064078±0.05230881**           | 0.4132321±0.003375583** | 0.7526957±0.01475578 |  |

| Time<br>(day) | <i>F2</i> Relative expression |                                     |                                     |                     |
|---------------|-------------------------------|-------------------------------------|-------------------------------------|---------------------|
|               | P                             | S                                   | M                                   | H                   |
| 1             | 1±0 <sup>***</sup>            | 0.5936894±0.06582111 <sup>***</sup> | 1.777728±0.01742604 <sup>**</sup>   | 2.130004±0.2292309  |
| 7             | 1±0                           | 0.5279561±0.08076297 <sup>*</sup>   | 0.5226942±0.08248904 <sup>*</sup>   | 0.8136721±0         |
| 13            | 1±0 <sup>*</sup>              | 0.600176±0.07141063 <sup>***</sup>  | 0.6872194±0.02581726 <sup>***</sup> | 1.264809±0.03839443 |

| Time<br>(day) | <i>F5</i> Relative expression |                                   |                                 |                     |
|---------------|-------------------------------|-----------------------------------|---------------------------------|---------------------|
|               | P                             | S                                 | M                               | H                   |
| 1             | 1±0                           | 0.332691±0.05679326               | 0.7120463±0.1523783             | 0.9667831±0.2238352 |
| 7             | 1±0 <sup>*</sup>              | 1.163835±0.1441385 <sup>*</sup>   | 1.537236±0.56442 <sup>*</sup>   | 3.241997±1.045898   |
| 13            | 1±0 <sup>***</sup>            | 2.103039±0.3894399 <sup>***</sup> | 5.094015±0.1851157 <sup>*</sup> | 7.145596±1.20831    |

| Time<br>(day) | <i>F7</i> Relative expression |                                      |                                  |                    |
|---------------|-------------------------------|--------------------------------------|----------------------------------|--------------------|
|               | P                             | S                                    | M                                | H                  |
| 1             | 1±0 <sup>***</sup>            | 0.3491078±0.005133064 <sup>***</sup> | 2.928524±0.7152218 <sup>**</sup> | 4.785264±0.5771259 |
| 7             | 1±0 <sup>***</sup>            | 0.7042646±0.07579293 <sup>**</sup>   | 1.16758±0.2628936 <sup>*</sup>   | 2.645736±0.7794414 |
| 13            | 1±0 <sup>***</sup>            | 1.964126±0.07699437 <sup>***</sup>   | 4.196167±0.3423964 <sup>**</sup> | 6.255023±0.6020027 |

H, hepatic plate-mimetic group; M, mixed 3D group; S, sandwich group; P, mixed 2D/plate group.  
 Comparison between H and other groups: <sup>\*</sup>*P* < 0.05, <sup>\*\*</sup>*P* < 0.01, <sup>\*\*\*</sup>*P* < 0.001

**Table S9.** Comparison of gene expression levels of hepatocyte structural polarity proteins (mean±standard deviation, n=3)

| Time (day) |                    | <i>ZO-1</i> Relative expression    |                                   |                    |  |
|------------|--------------------|------------------------------------|-----------------------------------|--------------------|--|
|            | P                  | S                                  | M                                 | H                  |  |
| 1          | 1±0                | 0.5073725±0.07433575               | 1.222372±0.11168                  | 1.482834±0.012113  |  |
| 7          | 1±0 <sup>***</sup> | 1.516752±0.07926027 <sup>***</sup> | 2.522051±0.5839198 <sup>*</sup>   | 3.796855±0.7213826 |  |
| 13         | 1±0 <sup>***</sup> | 2.741595±0.2638595 <sup>***</sup>  | 8.06509±0.06588193 <sup>***</sup> | 5.293767±1.107504  |  |

  

| Time (day) |                    | <i>Occludin</i> Relative expression     |                                  |                     |  |
|------------|--------------------|-----------------------------------------|----------------------------------|---------------------|--|
|            | P                  | S                                       | M                                | H                   |  |
| 1          | 1±0                | 0.4976248±0.0664674                     | 1.027969±0.06545456              | 1.755333±0.02580946 |  |
| 7          | 1±0 <sup>***</sup> | 1.117287±0.0000001192093 <sup>***</sup> | 3.455173±0.1185203 <sup>**</sup> | 5.627337±1.71052    |  |
| 13         | 1±0 <sup>***</sup> | 1.108751±0.04527339 <sup>***</sup>      | 4.069943±0.0199476 <sup>*</sup>  | 5.656756±0.3787575  |  |

  

| Time (day) |                   | <i>MRP2</i> Relative expression |                    |                      |  |
|------------|-------------------|---------------------------------|--------------------|----------------------|--|
|            | P                 | S                               | M                  | H                    |  |
| 1          | 1±0               | 0.4758608±0.01321485            | 0.777628±0.1514861 | 0.9487422±0.04338546 |  |
| 7          | 1±0               | 1.350917±0.1409964              | 1.404503±0.8161396 | 1.892837±0.7494608   |  |
| 13         | 1±0 <sup>**</sup> | 1.06113±0.0433289 <sup>**</sup> | 4.342758±0.1206    | 3.068679±0.865601    |  |

  

| Time (day) |                    | <i>DPPIV</i> Relative expression    |                                 |                      |  |
|------------|--------------------|-------------------------------------|---------------------------------|----------------------|--|
|            | P                  | S                                   | M                               | H                    |  |
| 1          | 1±0                | 0.5002428±0.06276498 <sup>*</sup>   | 0.6416527±0.2306971             | 1.116004±0.005470071 |  |
| 7          | 1±0 <sup>***</sup> | 1.016999±0.2435388 <sup>***</sup>   | 1.12588±0.2998816 <sup>**</sup> | 2.107581±0.3597825   |  |
| 13         | 1±0 <sup>**</sup>  | 0.4835809±0.01026999 <sup>***</sup> | 1.218084±0.1651177 <sup>*</sup> | 1.810666±0.02251712  |  |

| Time  |       | <i>NTCP</i> Relative expression |                      |                    |  |
|-------|-------|---------------------------------|----------------------|--------------------|--|
| (day) | P     | S                               | M                    | H                  |  |
| 1     | 1±0   | 0.2586869±0.03748237            | 0.4481162±0.01244436 | 0.763702±0.1229874 |  |
| 7     | 1±0** | 0.6115074±0.08563742***         | 1.646629±0.3286855*  | 3.400477±1.46865   |  |
| 13    | 1±0*  | 0.4683639±0.02065358**          | 1.187968±0.02522944* | 2.553051±0.2070147 |  |

| Time  |        | <i>CDI47</i> Relative expression |                        |                      |  |
|-------|--------|----------------------------------|------------------------|----------------------|--|
| (day) | P      | S                                | M                      | H                    |  |
| 1     | 1±0*** | 0.8093291±0.1329447***           | 1.385459±0.1400982**   | 1.826723±0.09247769  |  |
| 7     | 1±0*   | 0.5580937±0.0555275***           | 0.7571806±0.137782**   | 1.315044±0.1740706   |  |
| 13    | 1±0    | 0.4717139±0.05153196*            | 0.5242555±0.002569525* | 0.8466558±0.09799007 |  |

H, hepatic plate-mimetic group; M, mixed 3D group; S, sandwich group; P, mixed 2D/plate group.  
 Comparison between H and other groups: \* $P < 0.05$ , \*\* $P < 0.01$ , \*\*\* $P < 0.001$

**Table S10.** Significantly enriched KEGG pathways associated with differentially upregulated genes with a fold change of > 1.5 at different time points in the hepatic plate-mimetic 3D culture group (H) and the mixed 3D culture group (M)

| <b>Comparison</b> | <b>Pathway ID</b> | <b>Pathway Term</b>                      | <b>P-value</b> |
|-------------------|-------------------|------------------------------------------|----------------|
|                   | path:hsa04978     | Mineral absorption                       | 0.000157778    |
|                   | path:hsa00051     | Fructose and mannose metabolism          | 0.000169043    |
|                   | path:hsa00220     | Arginine biosynthesis                    | 0.000259352    |
|                   | path:hsa01230     | Biosynthesis of amino acids              | 0.00120009     |
|                   | path:hsa04066     | HIF-1 signaling pathway                  | 0.001342566    |
|                   | path:hsa04710     | Circadian rhythm                         | 0.001468243    |
| H1 Vs M1          | path:hsa01210     | 2-Oxocarboxylic acid metabolism          | 0.002387932    |
|                   | path:hsa04150     | mTOR signaling pathway                   | 0.002749162    |
|                   | path:hsa00750     | Vitamin B6 metabolism                    | 0.003741977    |
|                   | path:hsa00260     | Glycine, serine and threonine metabolism | 0.003813379    |
|                   | path:hsa00524     | Butirosin and neomycin biosynthesis      | 0.005183426    |
|                   | path:hsa04950     | Maturity onset diabetes of the young     | 0.008213594    |

---

|               |                                             |             |
|---------------|---------------------------------------------|-------------|
| path:hsa00330 | Arginine and proline metabolism             | 0.008491769 |
| path:hsa00310 | Lysine degradation                          | 0.0097392   |
| path:hsa05130 | Pathogenic Escherichia coli infection       | 0.011824311 |
| path:hsa04370 | VEGF signaling pathway                      | 0.016806951 |
| path:hsa04713 | Circadian entrainment                       | 0.01868368  |
| path:hsa05211 | Renal cell carcinoma                        | 0.021832632 |
| path:hsa00562 | Inositol phosphate metabolism               | 0.027689487 |
| path:hsa00910 | Nitrogen metabolism                         | 0.030209023 |
| path:hsa05220 | Chronic myeloid leukemia                    | 0.030270637 |
| path:hsa04931 | Insulin resistance                          | 0.031576834 |
| path:hsa00565 | Ether lipid metabolism                      | 0.035939195 |
| path:hsa01200 | Carbon metabolism                           | 0.036079    |
| path:hsa04670 | Leukocyte transendothelial migration        | 0.042239228 |
| path:hsa00520 | Amino sugar and nucleotide sugar metabolism | 0.042316647 |
| path:hsa05144 | Malaria                                     | 0.044560597 |
| path:hsa04510 | Focal adhesion                              | 0.045254979 |

---

---

|          |                      |                                                                           |             |
|----------|----------------------|---------------------------------------------------------------------------|-------------|
|          | path:hsa04110        | Cell cycle                                                                | 1.86E-05    |
|          | path:hsa03320        | PPAR signaling pathway                                                    | 0.000286215 |
|          | path:hsa04610        | Complement and coagulation cascades                                       | 0.000658424 |
|          | path:hsa04975        | Fat digestion and absorption                                              | 0.000939358 |
|          | path:hsa04977        | Vitamin digestion and absorption                                          | 0.000940273 |
|          | <b>path:hsa04976</b> | <b>Bile secretion</b>                                                     | 0.002054999 |
|          | path:hsa00051        | Fructose and mannose metabolism                                           | 0.003178358 |
|          | path:hsa00532        | Glycosaminoglycan biosynthesis-<br>chondroitin sulfate / dermatan sulfate | 0.005827585 |
| H7 Vs M7 | path:hsa04964        | Proximal tubule bicarbonate<br>reclamation                                | 0.008690179 |
|          | path:hsa04914        | Progesterone-mediated oocyte<br>maturation                                | 0.010024493 |
|          | path:hsa04918        | Thyroid hormone synthesis                                                 | 0.010439708 |
|          | path:hsa00062        | Fatty acid elongation                                                     | 0.010982863 |
|          | path:hsa03010        | Ribosome                                                                  | 0.013769553 |
|          | path:hsa00330        | Arginine and proline metabolism                                           | 0.014009647 |
|          | path:hsa00630        | Glyoxylate and dicarboxylate                                              | 0.01501891  |

---

---

|               |                                                     |             |
|---------------|-----------------------------------------------------|-------------|
|               | metabolism                                          |             |
| path:hsa00130 | Ubiquinone and other terpenoid-quinone biosynthesis | 0.017201333 |
| path:hsa05204 | Chemical carcinogenesis                             | 0.018598831 |
| path:hsa00561 | Glycerolipid metabolism                             | 0.024351538 |
| path:hsa00790 | Folate biosynthesis                                 | 0.027436293 |
| path:hsa04114 | Oocyte meiosis                                      | 0.027777323 |
| path:hsa00590 | Arachidonic acid metabolism                         | 0.028602292 |
| path:hsa00040 | Pentose and glucuronate interconversions            | 0.029379993 |
| path:hsa00380 | Tryptophan metabolism                               | 0.038527762 |
| path:hsa00260 | Glycine, serine and threonine metabolism            | 0.038527762 |
| path:hsa00190 | Oxidative phosphorylation                           | 0.038593421 |
| path:hsa00360 | Phenylalanine metabolism                            | 0.039534921 |
| path:hsa05219 | Bladder cancer                                      | 0.041016071 |
| path:hsa00511 | Other glycan degradation                            | 0.043940917 |
| path:hsa00980 | Metabolism of xenobiotics by                        | 0.047768876 |

---

---

cytochrome P450

---

|            |               |                                                          |             |
|------------|---------------|----------------------------------------------------------|-------------|
|            | path:hsa04120 | Ubiquitin mediated proteolysis                           | 0.003058741 |
|            | path:hsa05020 | Prion diseases                                           | 0.005744056 |
|            | path:hsa04115 | p53 signaling pathway                                    | 0.005823348 |
|            | path:hsa04724 | Glutamatergic synapse                                    | 0.006781086 |
|            | path:hsa05200 | Pathways in cancer                                       | 0.008219621 |
|            | path:hsa03013 | RNA transport                                            | 0.009188028 |
|            | path:hsa03050 | Proteasome                                               | 0.01086583  |
| H13 Vs M13 | path:hsa05202 | Transcriptional dysregulation in cancers                 | 0.011347171 |
|            | path:hsa03040 | Spliceosome                                              | 0.013123    |
|            | path:hsa00330 | Arginine and proline metabolism                          | 0.015376417 |
|            | path:hsa04550 | Signaling pathways regulating pluripotency of stem cells | 0.016514069 |
|            | path:hsa04072 | Phospholipase D signaling pathway                        | 0.017445152 |
|            | path:hsa03460 | Fanconi anemia pathway                                   | 0.017971936 |
|            | path:hsa05217 | Basal cell carcinoma                                     | 0.019829741 |

---

---

|               |                                                            |             |
|---------------|------------------------------------------------------------|-------------|
| path:hsa00500 | Starch and sucrose metabolism                              | 0.020797018 |
| path:hsa04150 | mTOR signaling pathway                                     | 0.024922433 |
| path:hsa00563 | Glycosylphosphatidylinositol (GPI)-<br>anchor biosynthesis | 0.028014266 |
| path:hsa04919 | Thyroid hormone signaling pathway                          | 0.035243312 |
| path:hsa05216 | Thyroid cancer                                             | 0.036907338 |
| path:hsa00650 | Butanoate metabolism                                       | 0.036907338 |
| path:hsa04920 | Adipocytokine signaling pathway                            | 0.037023613 |
| path:hsa04071 | Sphingolipid signaling pathway                             | 0.037145999 |
| path:hsa00052 | Galactose metabolism                                       | 0.039279326 |
| path:hsa04110 | Cell cycle                                                 | 0.041126985 |
| path:hsa04710 | Circadian rhythm                                           | 0.041707886 |
| path:hsa04215 | Apoptosis - multiple species                               | 0.044191601 |

---

H1/M1, Day 1; H7/M7, Day 7; H13/M13, Day 13

**Table S11.** Differentially expressed genes associated with bile secretion selected were analyzed by qPCR (mean±standard deviation, n=3)

| Time (day) | <i>AQP8</i> Relative expression |                      | Time (day) | <i>MRP2</i> Relative expression |                       |
|------------|---------------------------------|----------------------|------------|---------------------------------|-----------------------|
|            | M                               | H                    |            | M                               | H                     |
| 1          | 1±0*                            | 1.990887±0.05900449  | 1          | 1±0                             | 0.8312579±0.008148334 |
| 7          | 1±0**                           | 2.983497±0.4612111   | 7          | 1±0**                           | 1.529937±0.02999271   |
| 13         | 1±0                             | 0.6265533±0.02353821 | 13         | 1±0***                          | 2.956692±0.1255563    |
| Time (day) | <i>MDR1</i> Relative expression |                      | Time (day) | <i>MDR3</i> Relative expression |                       |
|            | M                               | H                    |            | M                               | H                     |
| 1          | 1±0                             | 0.7204214±0.01882982 | 1          | 1±0                             | 1.189309±0.1415074    |
| 7          | 1±0*                            | 1.545329±0.09083691  | 7          | 1±0*                            | 1.384652±0.0142716    |
| 13         | 1±0**                           | 2.710086±0.2419823   | 13         | 1±0**                           | 2.221313±0.08183114   |

| Time<br>(day) | <i>FXR</i> Relative expression                     |                           | Time<br>(day) | <i>RXR<math>\alpha</math></i> Relative expression |                           |
|---------------|----------------------------------------------------|---------------------------|---------------|---------------------------------------------------|---------------------------|
|               | M                                                  | H                         |               | M                                                 | H                         |
| 1             | 1 $\pm$ 0                                          | 1.305289 $\pm$ 0.1128833  | 1             | 1 $\pm$ 0*                                        | 1.427805 $\pm$ 0.05130831 |
| 7             | 1 $\pm$ 0**                                        | 2.036736 $\pm$ 0.08866728 | 7             | 1 $\pm$ 0**                                       | 2.231346 $\pm$ 0.131162   |
| 13            | 1 $\pm$ 0***                                       | 2.892278 $\pm$ 0.1280152  | 13            | 1 $\pm$ 0*                                        | 1.481471 $\pm$ 0.1498071  |
| Time<br>(day) | <i>SHP</i> Relative expression                     |                           | Time<br>(day) | <i>NTCP</i> Relative expression                   |                           |
|               | M                                                  | H                         |               | M                                                 | H                         |
| 1             | 1 $\pm$ 0**                                        | 1.578386 $\pm$ 0.02836432 | 1             | 1 $\pm$ 0                                         | 1.370812 $\pm$ 0.09398874 |
| 7             | 1 $\pm$ 0**                                        | 1.681224 $\pm$ 0.09608293 | 7             | 1 $\pm$ 0*                                        | 1.491654 $\pm$ 0.03898769 |
| 13            | 1 $\pm$ 0                                          | 0.9976249 $\pm$ 0.094392  | 13            | 1 $\pm$ 0**                                       | 2.071188 $\pm$ 0.158884   |
| Time<br>(day) | <i>OST-<math>\alpha</math></i> Relative expression |                           |               |                                                   |                           |
|               | M                                                  | H                         |               |                                                   |                           |
| 1             | 1 $\pm$ 0**                                        | 1.836304 $\pm$ 0.03599872 |               |                                                   |                           |
| 7             | 1 $\pm$ 0***                                       | 2.290733 $\pm$ 0.1084924  |               |                                                   |                           |
| 13            | 1 $\pm$ 0                                          | 1.116624 $\pm$ 0.05288485 |               |                                                   |                           |

H, hepatic plate-mimetic group; M, mixed 3D group. Comparison between H and M: \* $P < 0.05$ , \*\* $P < 0.01$ , \*\*\* $P < 0.001$
